# Supplementary material for: An FcεRI-IgE-based genetically encoded microfluidic cell sensor for fast Gram-negative bacterial screening in food samples
Source: Royal Society of Chemistry journal article supplement (doi:10.1039/c9an02289a), 2020-01-01
Supplement: c9an02289a1.pdf [file c9an02289a1.pdf]

## **Supplementary information:**

### **An FcεRI-IgE-based genetically encoded microfluidic cell sensor for fast gram-negative bacterial screening in food samples**

Hui Jiang<sup>a, b</sup>, Jun Yang<sup>b</sup>, Donglei Jiang<sup>c</sup>, Xiulan Sun<sup>\*a</sup>

<sup>a</sup> *State Key Laboratory of Food Science and Technology, School of Food Science and Technology, National Engineering Research Center for Functional Food, Synergetic Innovation Center of Food Safety and Nutrition, Jiangnan University, Wuxi, Jiangsu 214122, China*

<sup>b</sup> *Nanjing Institute for Food and Drug Control, Nanjing, Jiangsu 211198, PR China*

<sup>c</sup> *College of Food Science and Engineering, Nanjing University of Finance and Economics, Collaborative Innovation Center for Modern Grain Circulation and Safety, Key Laboratory of Grains and Oils Quality Control and Processing, Nanjing, Jiangsu 210023, PR China*

\*Corresponding author.

E-mail address: [sxlzyz@jiangnan.edu.cn](mailto:sxlzyz@jiangnan.edu.cn) (Xiulan Sun)

**Figures Caption:**

**Fig. S1.** Target sequence design of recombinant protein CD14(Rat)-Fc $\epsilon$  IgE.

**Fig. S2.** (A) Plasmid profile. (B) Agarose gel electrophoresis analysis of CD14(Rat)-IgE Fc plasmid. Lane M: DNA marker; Lane 1: Plasmid of transfection level.

**Fig. S3.** (A) Identification of protein expression. Lane 1: DMEM of control; Lane 2: DMEM of CD14-Fc $\epsilon$ ; Lane M1: SDS-PAGE Marker. (B) SDS-PAGE of affinity purification. Lane M: SDS-PAGE Marker; Lane 1: Supernatant after centrifugation; Lane 2: Effluent after supernatant incubating with Ni-IDA; Lane 3-6: Elution fractions. (C) SDS-PAGE and Western Blot. Left: SDS-PAGE. Right: Western Blot (using anti-His tag antibody). Lane 1: BSA (1.0  $\mu$ g); Lane 2: CD14-Fc $\epsilon$  protein (1.2  $\mu$ g)(Reduced); Lane 3: CD14-Fc $\epsilon$  protein (1.2  $\mu$ g)(Non-Reduced); Lane M1: SDS-PAGE Marker; Lane M2: Western Blot Marker.

**Fig. S4.** Standard curve of protein quantification using BCA.

**Fig. S5.** Immunofluorescence images of CD14-Fc $\epsilon$  bound to *E. coli* ATCC 25922. The bacteria were heat-killed and then incubated with (A) or without (B) CD14-Fc $\epsilon$  (6  $\mu$ g/mL) followed by anti-CD14 (2  $\mu$ g/mL) and IgG-FITC.

**Fig. S6.** Plasmid profile of pLenti-CMV-GCaMP6(s)-2A-Tdtomato

**Fig. S7.** Lentiviral vector transfection and selection of stable transfection cell lines.

**Fig. S8.** Cell viability and fluorescence efficiency.

**Fig. S9.** Fluorescence images of stable transfection RBL-2H3 cell lines after A23187 stimulation.

**Fig. S10.**  $\beta$ -hexosaminidase assay for confirmation of RBL-2H3 cells activated by *E.coli* ATCC 25922.

**Table S1** Comparison of other methods for bacteria detection.

**Target protein sequence:**

CD14(Rat)-IgE Fc protein Length=604 MW=66008.8 pI=6.78

```
1   SPATPEPCEL DQDEESVRCY CNFSDPQPNW SSAFLCAGAE DVEFYGGGRS LEYLLKRVDT
61  EANLGQYTDI IRSLEPLKRLT VRSARVPTQI LFGTLRVLYG SGLRELTLEN LEVTGTALSP
121 LLDATGPDNL TSLLRNVSWA TDTWLAELQ QWLKPKLKV SIAQAHSLNF SCKQVGVFPA
181 LATLDLSDNP ELGKGLISA LCPHKFPTLQ VLALRNAGME TTSGVCSALA AARVPLQALD
241 LSHNSLRDTA GTPSCDWPSQ LNSLNLSFTG LEHVPKGLPA KLSVLDLSYN RLDRKPRPEE
301 LPEVGSLSLT GNPFLHSESQ SEAYNSGVVI ATALSPGSAG LSGTLALLG HRLFVHHHHH
361 HGGGSGGGG SGGGSDDEP RGVITYLIPP SPLDLYENGT PKLTCLVLDL ESEENITVTW
421 VRERKKSIGS ASQRSTKHHN ATTSITSILP VDAKDWIEGE GYQCRVDHPH FPKPIVRSIT
481 KAPGKRSAPE VYVFLPPEEE EKDKRTLCL IQNFFPEDIS VQWLQDSKLI PKSQHSTTPE
541 LKYNQSNQRF FIFSRLEVTK ALWTQTKQFT CRVIHEALRE PRKLERTISK SLGNTSLRPS
601 QASM
```

( CD14(Rat) +His +Linker+IgE Fc (CH3+CH4) )

Fig. S1. Target sequence design of recombinant protein CD14(Rat)-Fc IgE.

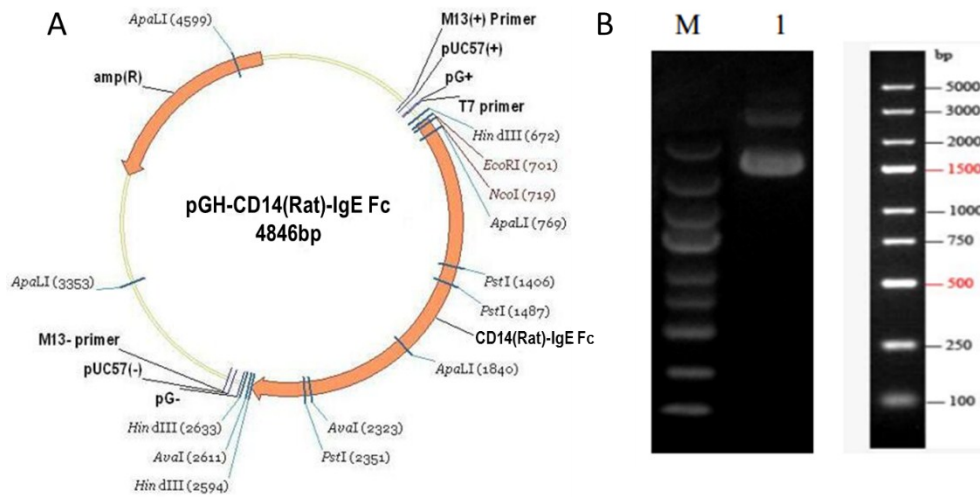

Fig. S2. (A) Plasmid profile. (B) Agarose gel electrophoresis analysis of CD14(Rat)-IgE Fc plasmid. Lane M: DNA marker; Lane 1: Plasmid of transfection level.

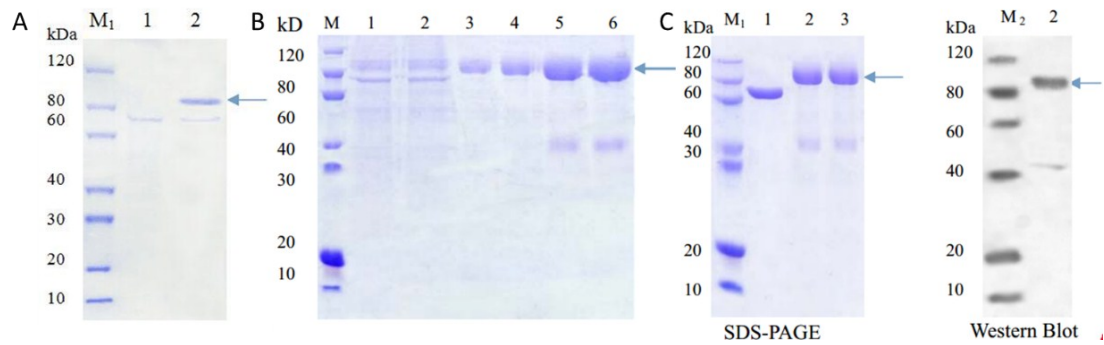

Fig. S3. (A) Identification of protein expression. Lane 1: DMEM of control; Lane 2: DMEM of CD14-Fcε; Lane M1: SDS-PAGE Marker. (B) SDS-PAGE of affinity purification. Lane M: SDS-PAGE Marker; Lane 1: Supernatant after centrifugation; Lane 2: Effluent after supernatant incubating with Ni-IDA; Lane 3-6: Elution fractions. (C) SDS-PAGE and Western Blot. Left: SDS-PAGE. Right: Western Blot (using anti-His tag antibody). Lane 1: BSA (1.0 μg); Lane 2: CD14-Fcε protein (1.2 μg)(Reduced); Lane 3: CD14-Fcε protein (1.2 μg)(Non-Reduced); Lane M1: SDS-PAGE Marker; Lane M2: Western Blot Marker.

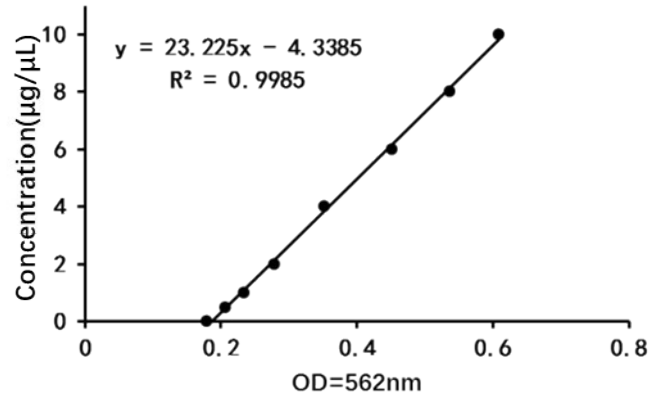

Fig. S4. Standard curve of protein quantification using BCA.

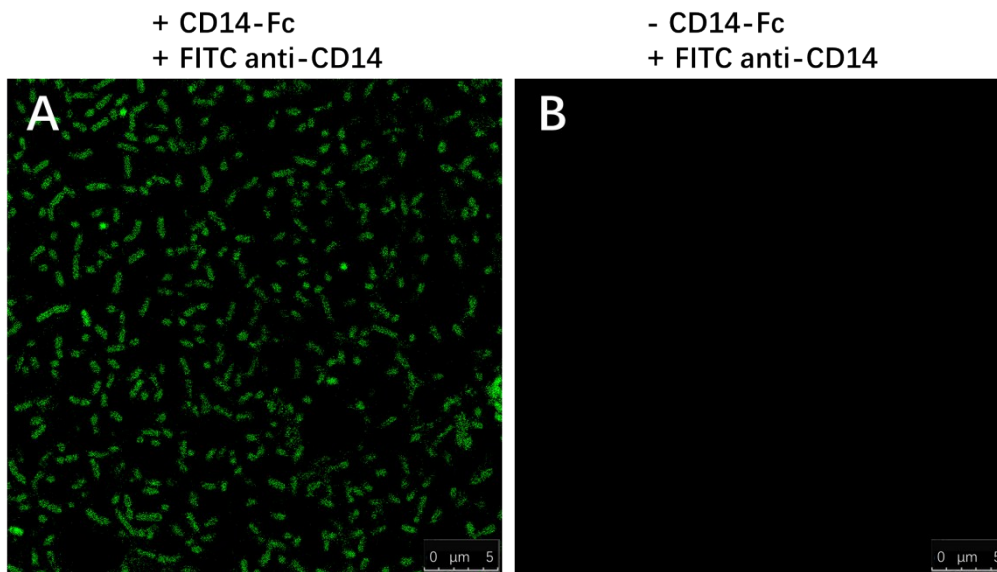

Fig. S5. Immunofluorescence images of CD14-Fc $\epsilon$  bound to *E. coli* ATCC 25922. The bacteria were heat-killed and then incubated with (A) or without (B) CD14-Fc $\epsilon$  (6  $\mu$ g/mL) followed by anti-CD14 (2  $\mu$ g/mL) and IgG-FITC.

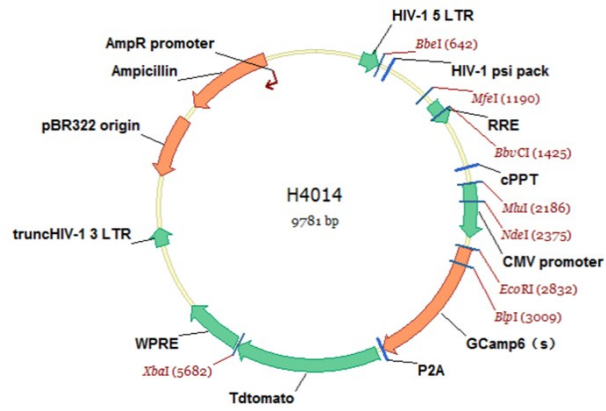

Fig. S6. Plasmid profile of pLenti-CMV-GCaMP6(s)-2A-Tdtomato



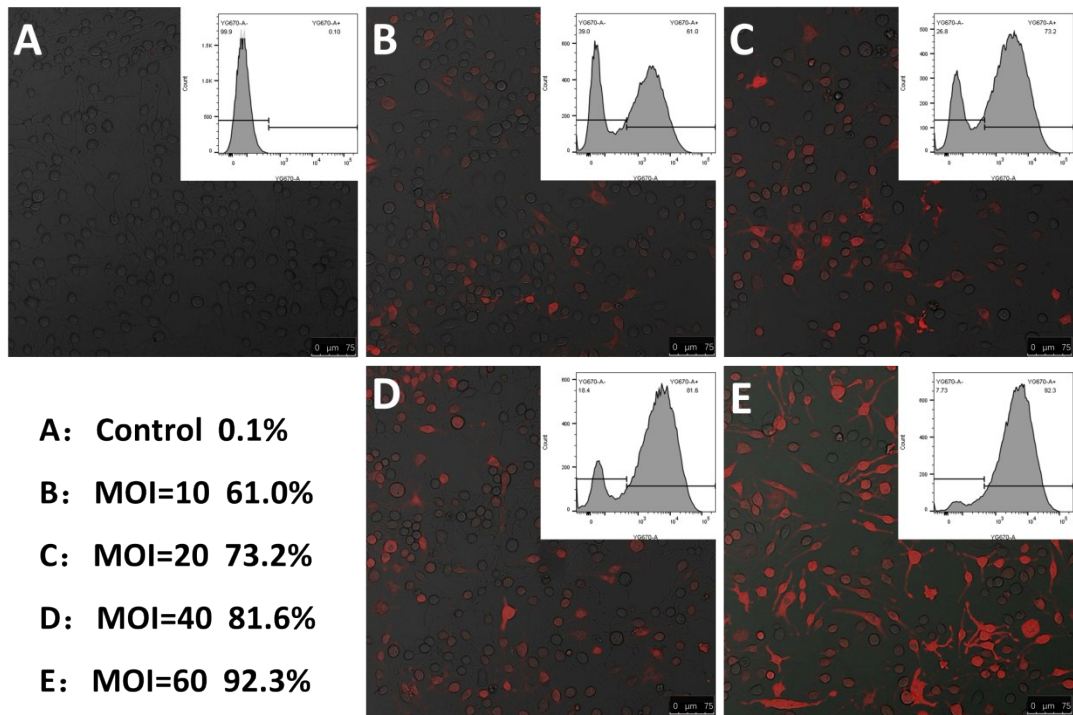

Fig. S7. Lentiviral vector transfection and selection of stable transfection cell lines.

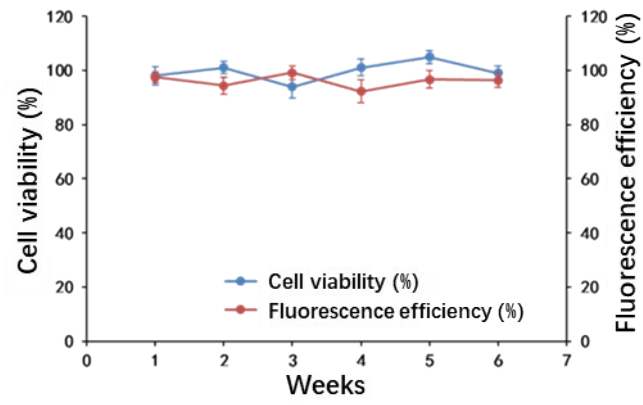

Fig. S8. Cell viability and fluorescence efficiency.

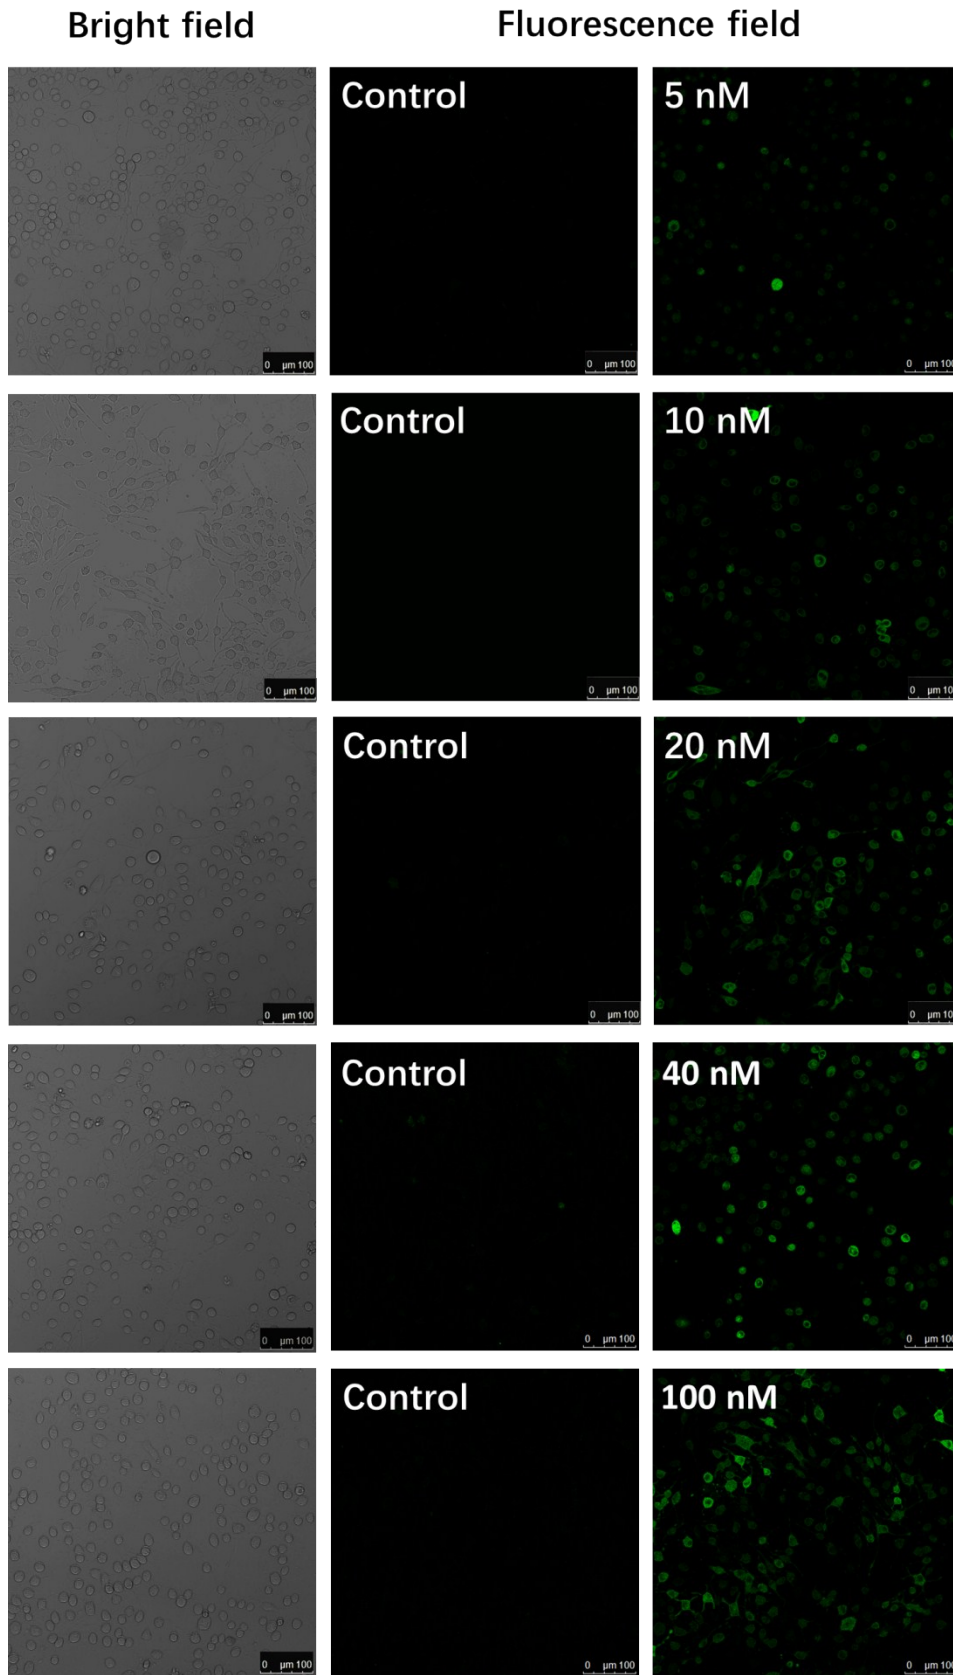

Fig. S9. Fluorescence images of stable transfection RBL-2H3 cell lines after A23187 stimulation.

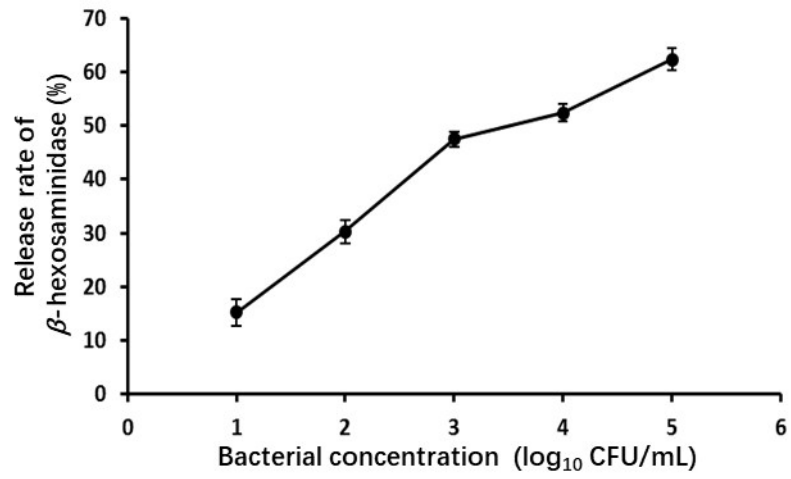

Fig. S10.  $\beta$ -hexosaminidase assay for confirmation of RBL-2H3 cells activated by *E.coli* ATCC 25922.

**Table S1** Comparison of other methods for bacteria detection.

| Target                            | Detection method                                                   | Linear range (CFU/mL)                 | LOD (CFU/mL)       | Detection time    | Ref.                   |
|-----------------------------------|--------------------------------------------------------------------|---------------------------------------|--------------------|-------------------|------------------------|
| <i>E. coli O157:H7</i>            | Impedance based ferrocene-antimicrobial peptide modified biosensor | $10^3$ – $10^7$                       | $10^3$             | a couple of hours | (Li et al. 2014)       |
| <i>E. coli O157:H7</i>            | Aptamer-based QCM sensor                                           | $10^2$ – $10^7$                       | $1.46 \times 10^3$ | 1 h               | (Yu et al. 2018)       |
| <i>E. coli O157:H7</i>            | Microfluidic colorimetric biosensor                                | $5.0 \times 10^1$ – $5.0 \times 10^4$ | 50                 | 45 min            | (Zheng et al. 2019)    |
| <i>E. coli O157:H7</i>            | Fluorescent biosensor                                              | $10$ – $10^6$                         | 14                 | 2 h               | (Xue et al. 2018)      |
| <i>E. coli</i>                    | Automated microfluidic-based electrochemical sensor                | $10$ – $3.97 \times 10^7$             | 50                 | 8 min             | (Altintas et al. 2018) |
| <i>S. aureus</i>                  | Aptamer-based hydrogel barcodes                                    | $10^2$ – $10^4$                       | 100                | 2.5 h             | (Xu et al. 2018)       |
| <i>E. faecalis</i>                | Molecularly imprinted nanoparticles based plasmonic sensor         | $2 \times 10^4$ – $1 \times 10^8$     | $1.05 \times 10^2$ | 15 min            | (Erdem et al. 2019)    |
| <i>S. Enteritidis</i>             | Gram staining and direct immunoassay                               | $10^3$ – $10^8$                       | 800                | 11 min            | (Bu et al. 2019)       |
| <i>V. parahaemolyticus</i>        | Aptamer-based visualized detection                                 | $10$ – $10^6$                         | 10                 | 2 h               | (Song et al. 2019)     |
| <i>E. coli</i> & <i>S. aureus</i> | Paper-based colorimetric assay                                     | $10^4$ – $10^8$                       | $10^4$             | 20 min            | (Sun et al. 2019)      |
| gram-negative bacteria            | FcεRI-IgE-based genetically encoded microfluidic cell sensor       | $8 \times 10^1$ – $5 \times 10^3$     | 80                 | 2.5 min           | This study             |

## References

- Altintas, Z., Akgun, M., Kokturk, G., Uludag, Y., 2018. A fully automated microfluidic-based electrochemical sensor for real-time bacteria detection. *Biosensors & Bioelectronics* 100, 541-548.
- Bu, T., Huang, Q., Yan, L., Zhang, W., Dou, L., Huang, L., Yang, Q., Zhao, B., Yang, B., Li, T., Wang, J., Zhang, D., 2019. Applicability of biological dye tracer in strip biosensor for ultrasensitive detection of pathogenic bacteria. *Food Chemistry* 274, 816-821.
- Erdem, O., Saylan, Y., Cihangir, N., Denizli, A., 2019. Molecularly imprinted nanoparticles based plasmonic sensors for real-time *Enterococcus faecalis* detection. *Biosensors & Bioelectronics* 126, 608-614.
- Li, Y., Afrasiabi, R., Fathi, F., Wang, N., Xiang, C., Love, R., She, Z., Kraatz, H.-B., 2014. Impedance based detection of pathogenic *E. coli* O157:H7 using a ferrocene-antimicrobial peptide modified biosensor. *Biosensors & Bioelectronics* 58, 193-199.
- Song, S., Wang, X., Xu, K., Xia, G., Yang, X., 2019. Visualized Detection of *Vibrio parahaemolyticus* in Food Samples Using Dual-Functional Aptamers and Cut-Assisted Rolling Circle Amplification. *Journal of Agricultural and Food Chemistry* 67(4), 1244-1253.
- Sun, J., Huang, J., Li, Y., Lv, J., Ding, X., 2019. A simple and rapid colorimetric bacteria detection method based on bacterial inhibition of glucose oxidase-catalyzed reaction. *Talanta* 197, 304-309.
- Xu, Y., Wang, H., Luan, C., Liu, Y., Chen, B., Zhao, Y., 2018. Aptamer-based hydrogel barcodes for the capture and detection of multiple types of pathogenic bacteria. *Biosensors & Bioelectronics* 100, 404-410.
- Xue, L., Zheng, L., Zhang, H., Jin, X., Lin, J., 2018. An ultrasensitive fluorescent biosensor using high gradient magnetic separation and quantum dots for fast detection of foodborne pathogenic bacteria. *Sensors and Actuators B-Chemical* 265, 318-325.
- Yu, X., Chen, F., Wang, R., Li, Y., 2018. Whole-bacterium SELEX of DNA aptamers for rapid detection of *E. coli* O157:H7 using a QCM sensor. *Journal of Biotechnology* 266, 39-49.
- Zheng, L., Cai, G., Wang, S., Liao, M., Li, Y., Lin, J., 2019. A microfluidic colorimetric biosensor for rapid detection of *Escherichia coli* O157:H7 using gold nanoparticle aggregation and smart phone imaging. *Biosensors & Bioelectronics* 124, 143-149.
